# Supplementary material for: Modulating the packing of [Cu24(isophthalate)24] cuboctahedra in a triazole-containing metal–organic polyhedral framework
Source: Royal Society of Chemistry journal article supplement (doi:10.1039/c3sc21769h), 2013-01-01
Supplement: c3sc21769h.pdf [file c3sc21769h.pdf]

## Supporting Information

### Modulating the Packing of [Cu<sub>24</sub>(isophthalate)<sub>24</sub>] Cuboctahedra in a Triazole-Containing Metal-Organic Polyhedral Framework

Yong Yan,<sup>a</sup> Mikhail Suetin,<sup>a</sup> Elena Bichoutskaia,<sup>a</sup> Alexander J. Blake,<sup>a</sup> David R. Allan,<sup>b</sup> Sarah A. Barnett<sup>b</sup> and Martin Schröder<sup>\*a</sup>

a. School of Chemistry, University of Nottingham, University Park, Nottingham NG7 2RD, UK

b. Diamond Light Source, Harwell Science and Innovation Campus, Didcot, Oxfordshire OX11 0DE.

**1. Materials and General methods.** Commercially available reagents were used as received without further purification. Elemental analyses (C, H, and N) were performed on a CE-440 elemental analyzer at the University of Nottingham. IR spectra were recorded in the range of 550–4000  $\text{cm}^{-1}$  on a Nicolet is5 FT-IR spectrophotometer using the attenuated total reflectance (ATR) mode.  $^1\text{H}$  NMR spectra were recorded on a Bruker DRX-300 spectrometer. Thermal gravimetric analyses (TGA) were performed under a flow of nitrogen (20 mL/min) with a heating rate of 5  $^{\circ}\text{C}/\text{min}$  using a TA SDT-600 thermogravimetric analyzer. X-ray Powder Diffraction (PXRD) measurements were carried out at room temperature on a PANalytical X'Pert PRO diffractometer using  $\text{Cu-}K\alpha$  radiation ( $\lambda = 1.5418 \text{ \AA}$ ) at 40 kV, 40 mA, at a scan speed of  $0.02^{\circ}/\text{s}$  and a step size of  $0.005^{\circ}$  in  $2\theta$ .

**$\text{N}_2$ ,  $\text{H}_2$  and  $\text{CO}_2$  Isotherms.**  $\text{N}_2$ ,  $\text{H}_2$  and  $\text{CO}_2$  isotherms were determined using an IGA gravimetric adsorption apparatus (Hiden) at the University of Nottingham in a clean ultra high vacuum system with a diaphragm and turbo pumping system. Before measurements, about 120 mg solvent-exchanged samples were loaded into the sample basket within the adsorption instrument and then degassed under dynamic vacuum at 110  $^{\circ}\text{C}$  for 12 h to obtain the fully desolvated samples. In  $\text{H}_2$  adsorption experiments, ultra-pure plus grade  $\text{H}_2$  (99.9995%, BOC Gases) was purified further using calcium aluminosilicate and activated carbon adsorbents to remove trace amounts of water and other impurities before introduction into the IGA system. The density of liquid  $\text{H}_2$  at the boiling point ( $0.0708 \text{ g}/\text{cm}^3$ ) was used for the adsorbate buoyancy correction. The density of bulk  $\text{H}_2$  in the buoyancy correction was calculated by the Redlich-Kwong-Soave equation of state of  $\text{H}_2$  which is built within the IGASWIN software of the IGA system.

## 2. Synthesis of H<sub>6</sub>BTTI and NOTT-122

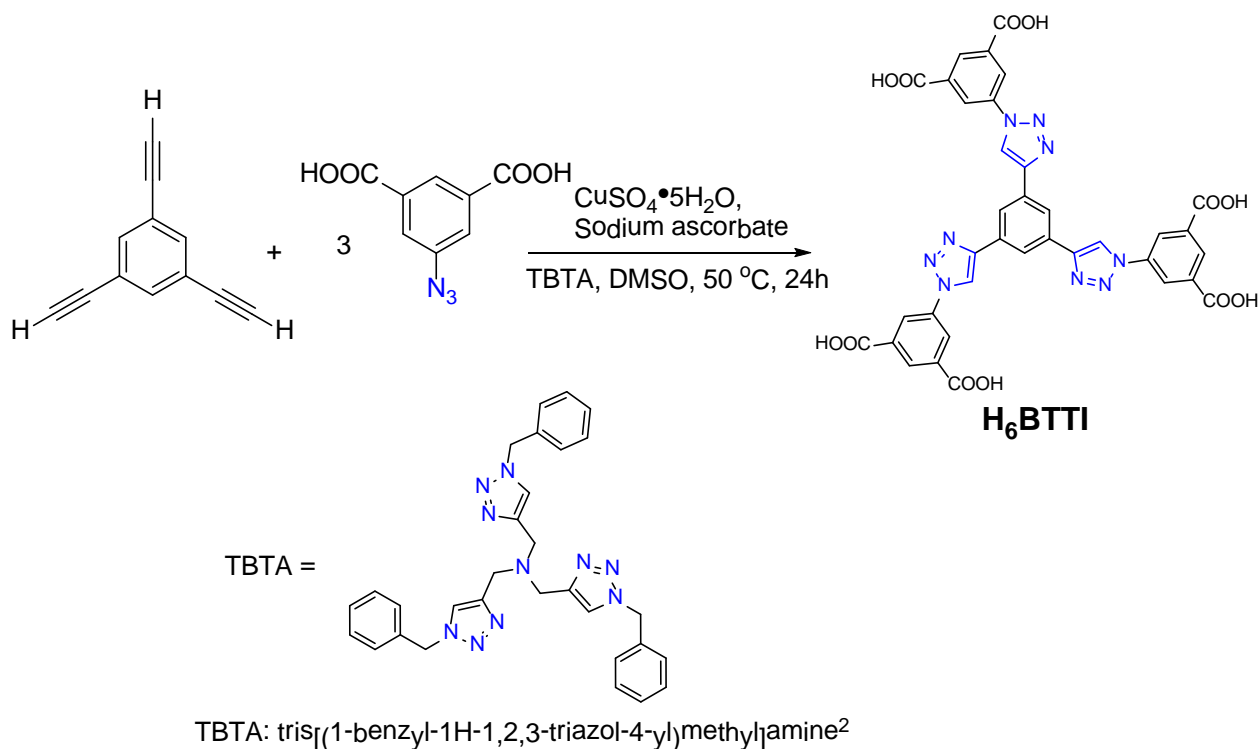

**Synthesis of H<sub>6</sub>BTTI.** A mixture of 1,3,5-triethynylbenzene<sup>1</sup> (1.5 g, 10 mmol, 1 equiv.), 5-azidoisophthalic acid<sup>1</sup> (6.8 g, 33 mmol, 3.3 equiv.), sodium ascorbate (0.990 g, 5 mmol, 0.5 equiv.), TBTA<sup>2</sup> (372 mg, 0.7 mmol) and DMSO/H<sub>2</sub>O (20/1, 105 mL) was degassed under Ar for 30 min. CuSO<sub>4</sub>•5H<sub>2</sub>O (374 mg, 1.5 mmol) was added and the mixture stirred for 48 h at 50 °C. The mixture was treated with water and the precipitate was collected by filtration. The crude product was purified by recrystallization from DMSO/DMF to afford H<sub>6</sub>BTTI as a white powder (6.3 g, 82 %). <sup>1</sup>H-NMR (300 MHz, DMSO-*d*<sub>6</sub>): δ (ppm) = 13.601 (s, 6H, COOH), 9.450 (s, 3H, ArH), 8.567 (s, 6H, ArH), 8.402 (s, 6H, ArH). MS (ESI) *m/z* = [M-H]<sup>-</sup> 770.1270.

**Synthesis of NOTT-122, [Cu<sub>3</sub>(C<sub>36</sub>H<sub>15</sub>O<sub>12</sub>N<sub>9</sub>)(H<sub>2</sub>O)<sub>3</sub>]•10DMF•10H<sub>2</sub>O.** H<sub>6</sub>BTTI (0.1 g, 0.13 mmol) and Cu(NO<sub>3</sub>)<sub>2</sub>•2.5H<sub>2</sub>O (0.186 g, 0.8 mmol) were mixed and dispersed in DMF/H<sub>2</sub>O (15 mL, 5:1 v/v). HCl (2 M, 0.3 mL) was added to the mixture which was mixed thoroughly. The solution was heated without stirring using at 85 °C using an oil bath for 18 h, and a large amount of microcrystalline product precipitated. The blue-green crystalline product was separated by filtration and washed with warm DMF, and dried briefly in

air. Yield: 0.15 g (60%). Anal. Calcd (Found) for  $C_{66}H_{111}Cu_3N_{19}O_{35}$ : C, 41.26 (41.33); H, 5.82 (5.21); N, 13.85 (13.75)%.

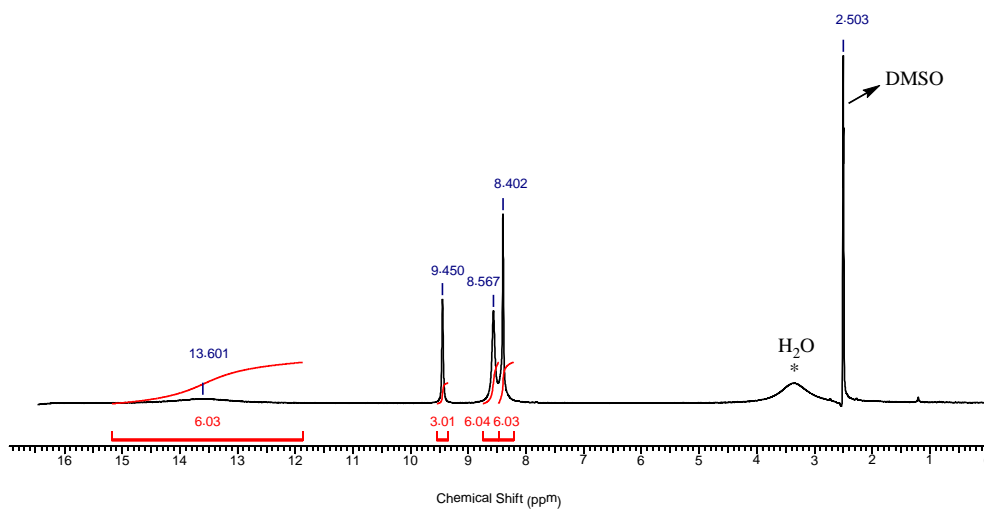

**Figure S1.**  $^1\text{H}$ -NMR spectrum of  $\text{H}_6\text{BTTI}$  in  $\text{DMSO-}d_6$ .

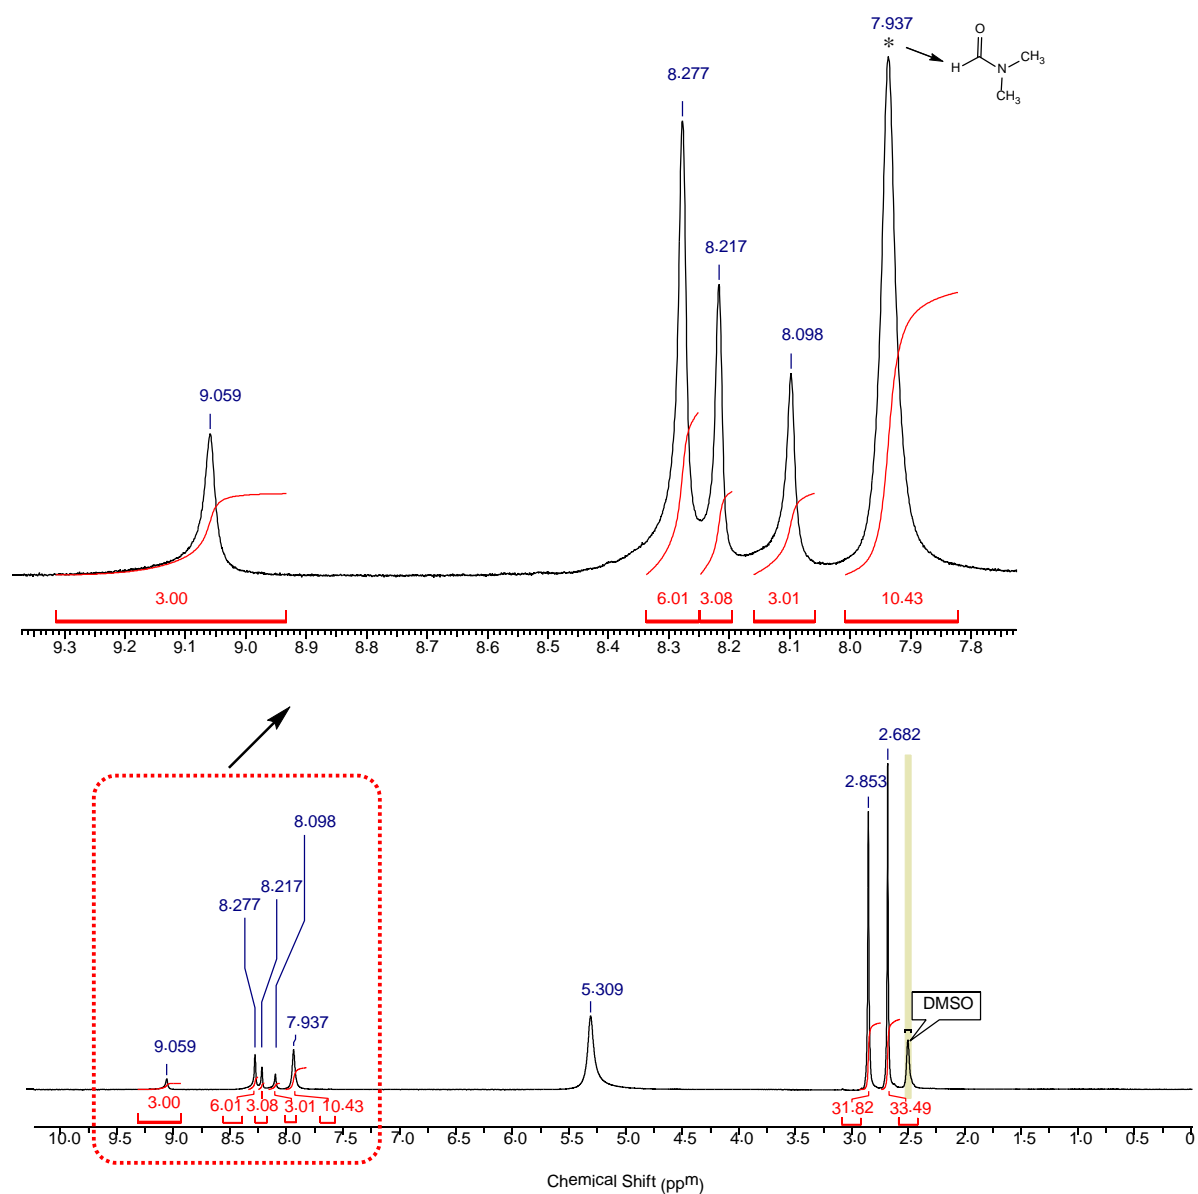

**Figure S2.** <sup>1</sup>H NMR spectrum of the as-synthesised NOTT-122 after digesting in DCl/DMSO-*d*<sub>6</sub> solution.

Integration of the DMF proton signals gives the ratio of the DMF molecules and the BTTF<sup>6-</sup> unit as 10 : 1 within the formula of NOTT-122.

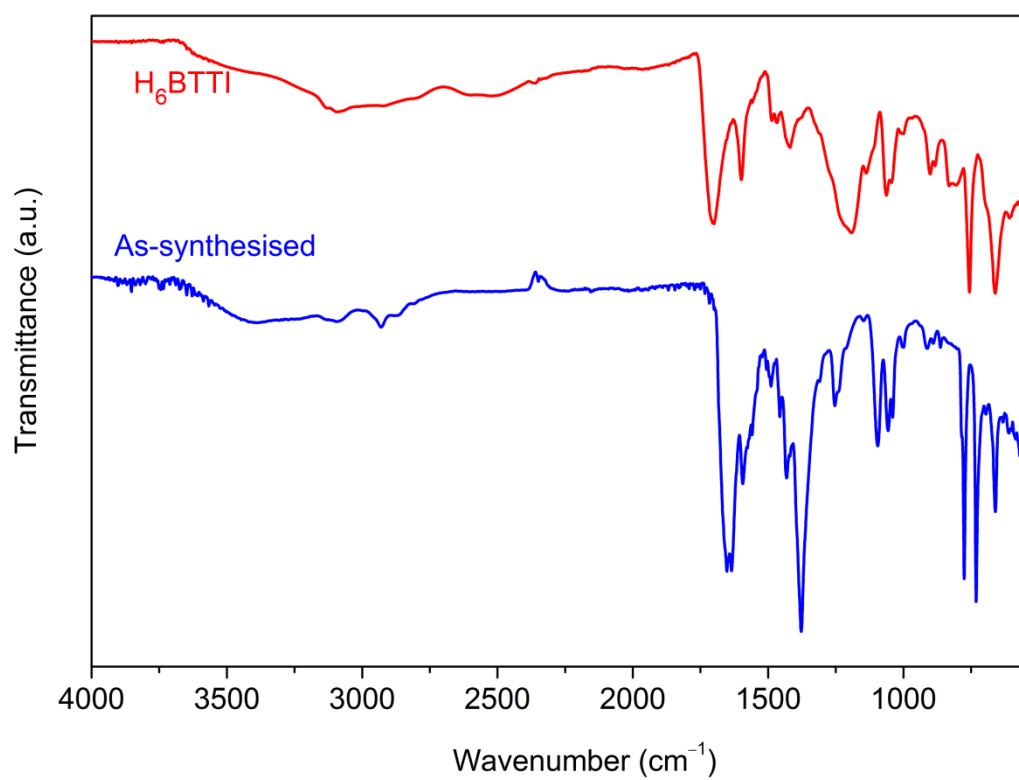

**Figure S3.** IR spectrum of H<sub>6</sub>BTTI and of as-synthesised NOTT-122.

### 3. Single Crystal X-ray Structure Determination on NOTT-122

Single crystal diffraction data were collected on Beamline I19 of Diamond Light Source, Oxford, UK. Details of the data collection are included in the CIF. The structure was solved by direct methods and developed by difference Fourier techniques, both using the SHELXTL software package.<sup>3</sup> The hydrogen atoms of the ligands were placed geometrically and refined using a riding model, and the hydrogen atoms of the coordinated water molecules could not be located but are included in the formula. The unit cell volume includes a large region of disordered solvent which could not be modelled as discrete atomic sites. We therefore employed PLATON/SQUEEZE<sup>4</sup> to calculate the contribution of the solvent region to the diffraction and thereby produced a set of solvent-free diffraction intensities.

**Table S1.** Crystal data and structure refinement details for NOTT-122.

|                                                                                   | NOTT-122                                                                         |
|-----------------------------------------------------------------------------------|----------------------------------------------------------------------------------|
| Formula                                                                           | C <sub>66</sub> H <sub>111</sub> Cu <sub>3</sub> N <sub>19</sub> O <sub>35</sub> |
| Formula weight                                                                    | 1921.36                                                                          |
| Temperature                                                                       | 123 (2) K                                                                        |
| Radiation type                                                                    | Synchrotron                                                                      |
| $\lambda$ (Å)                                                                     | 0.6889                                                                           |
| Crystal System                                                                    | Tetragonal                                                                       |
| Space Group                                                                       | <i>I4/m</i>                                                                      |
| Unit Cell Dimensions                                                              | $\alpha = \beta = \gamma = 90^\circ$<br>$a = b = 30.926(5)$ Å, $c = 45.103(7)$ Å |
| Volume                                                                            | $43137(11)$ Å <sup>3</sup>                                                       |
| <i>Z</i>                                                                          | 16                                                                               |
| Density                                                                           | 1.183 g/cm <sup>3</sup>                                                          |
| Absorption coefficient                                                            | 0.663 mm <sup>-1</sup>                                                           |
| <i>F</i> (000)                                                                    | 16112                                                                            |
| Crystal Size                                                                      | 0.1 × 0.1 × 0.1 mm <sup>3</sup>                                                  |
| Reflections collected                                                             | 53063                                                                            |
| Independent reflections                                                           | 18798 [ <i>R</i> <sub>int</sub> = 0.0491]                                        |
| Absorption correction                                                             | multi-scan                                                                       |
| Refinement method                                                                 | Full-matrix least-squares on <i>F</i> <sup>2</sup>                               |
| Data / restraints / parameters                                                    | 18798 / 488/ 553                                                                 |
| GOF on <i>F</i> <sup>2</sup>                                                      | 1.012                                                                            |
| Final <i>R</i> indices [ <i>I</i> > 2 $\sigma$ ( <i>I</i> )]                      | <i>R</i> <sub>1</sub> = 0.065, <i>wR</i> <sub>2</sub> = 0.189                    |
| Final <i>R</i> indices (all data)                                                 | <i>R</i> <sub>1</sub> = 0.081, <i>wR</i> <sub>2</sub> = 0.201                    |
| Difference Fourier map: maximum peak, minimum trough ( <i>e</i> Å <sup>-3</sup> ) | 1.184, -0.554                                                                    |

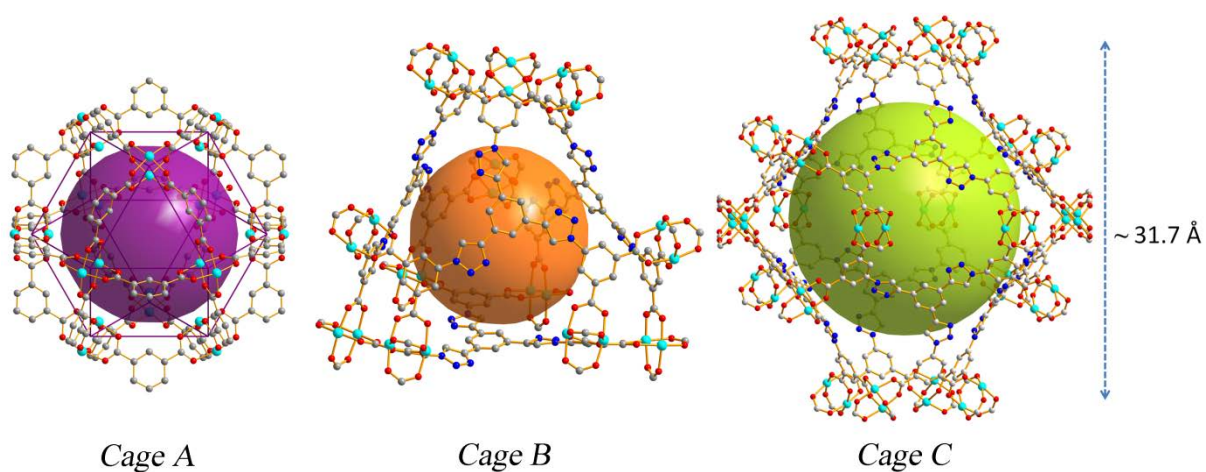

**Figure S4.** View of three different cages in NOTT-122.

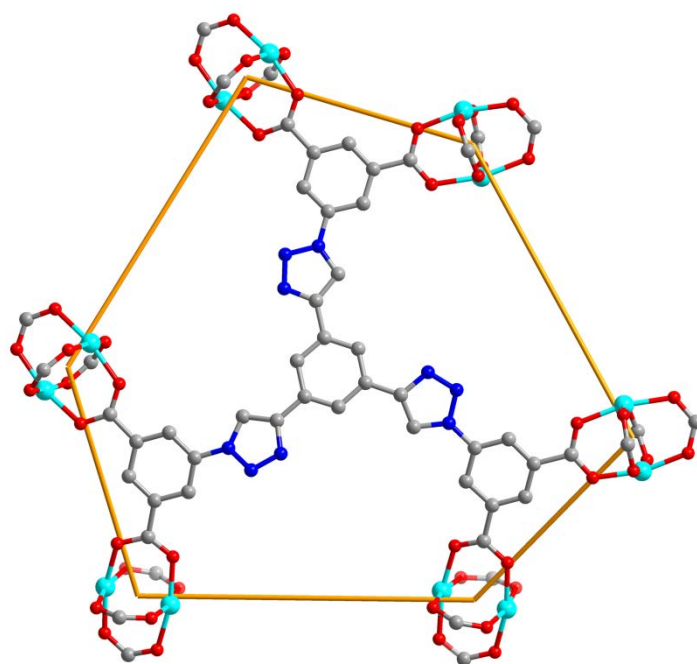

**Figure S5.** View of the distorted hexagonal face formed by the linker (BTfI)<sup>6-</sup> with {Cu<sub>2</sub>(COO)<sub>4</sub>} paddlewheels in NOTT-122.



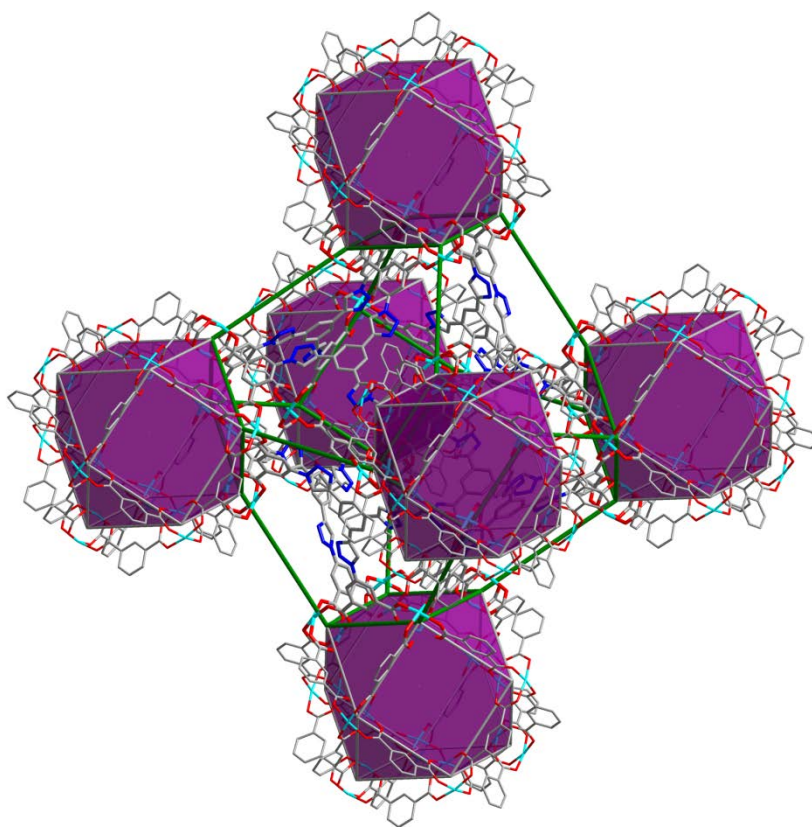

**Figure S6.** View of the packing of the cuboctahedra and the distorted truncated octahedra in NOTT-122.

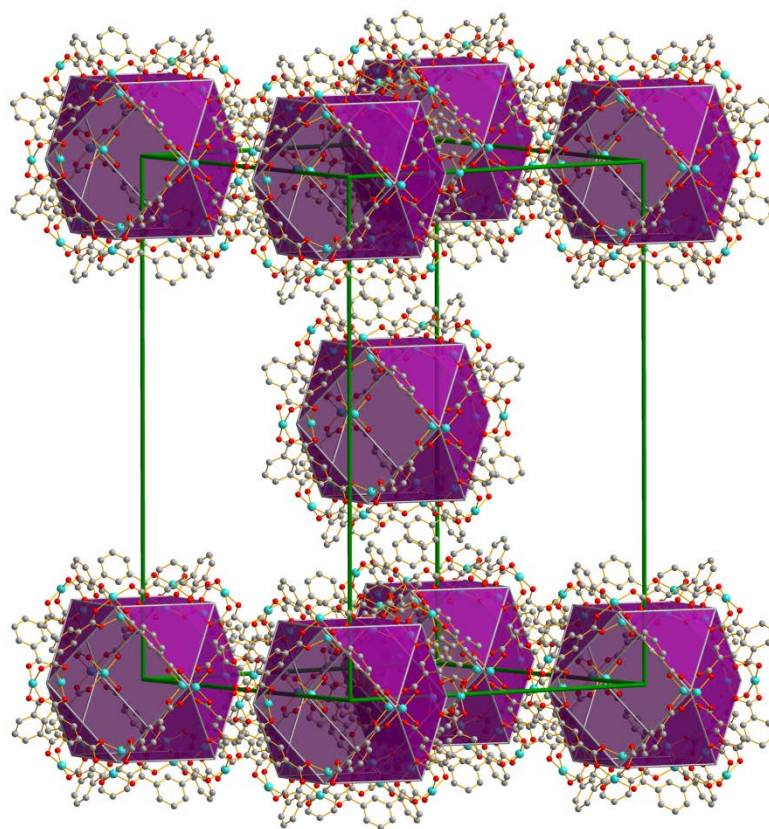

**Figure S7.** View of the body-centred tetragonal packing of cuboctahedra in the framework of NOTT-122.

#### 4. TGA plot

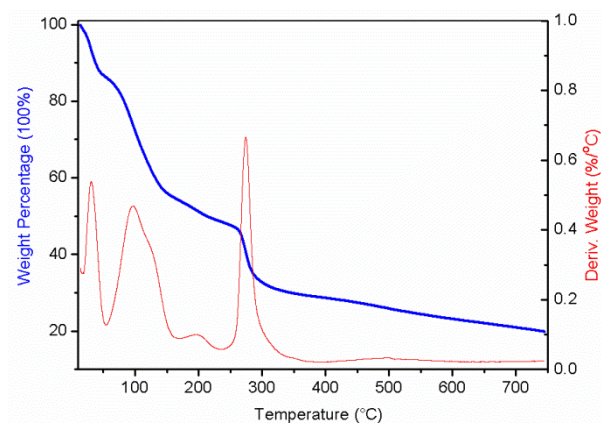

**Figure S8.** TGA plot of as-synthesised NOTT-122.

## 5. PXRD patterns

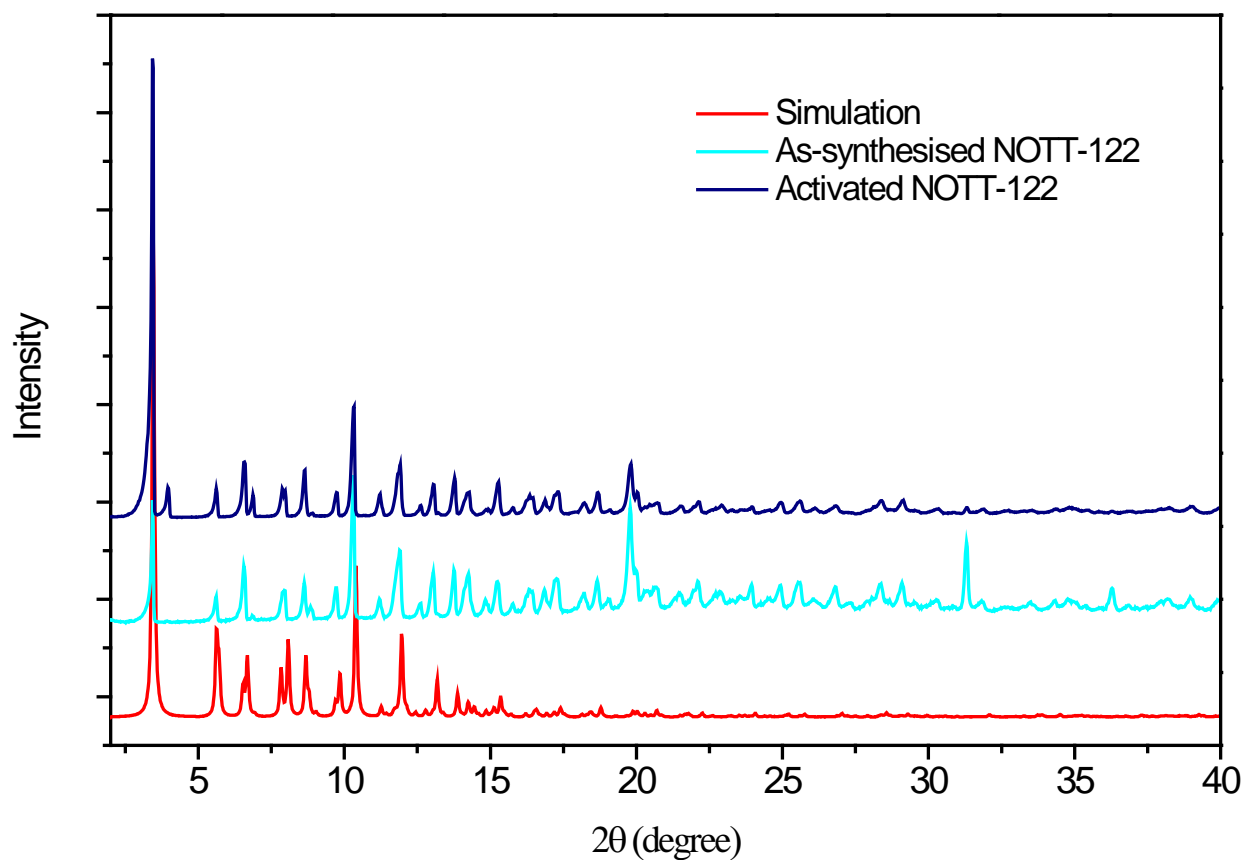

**Figure S9.** The PXRD patterns for NOTT-122. The activated sample was obtained by heating the acetone-exchange sample at 110 °C under dynamic vacuum for 12 h.

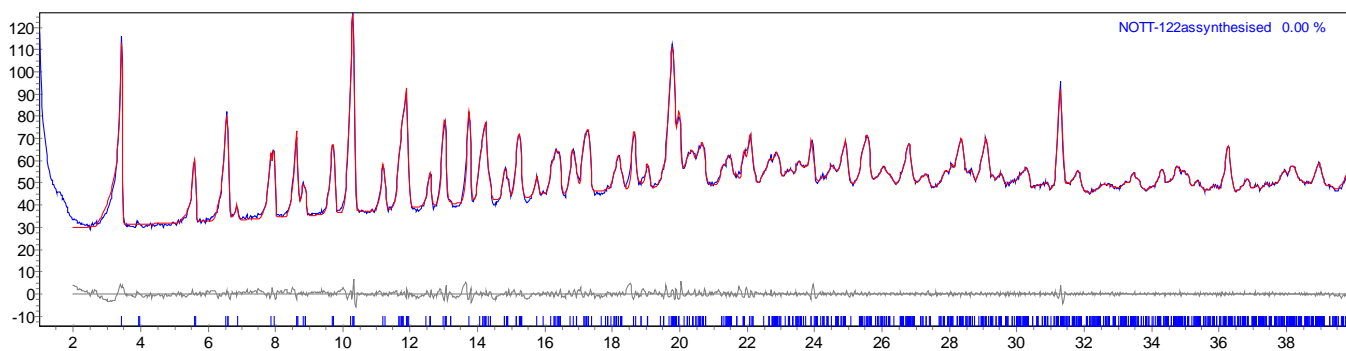

**Figure S10.** Le Bail fitting for the PXRD pattern of as-synthesised NOTT-122 (red: calculated; blue: observed; gray: difference;  $R_{wp} = 4.24\%$ ).

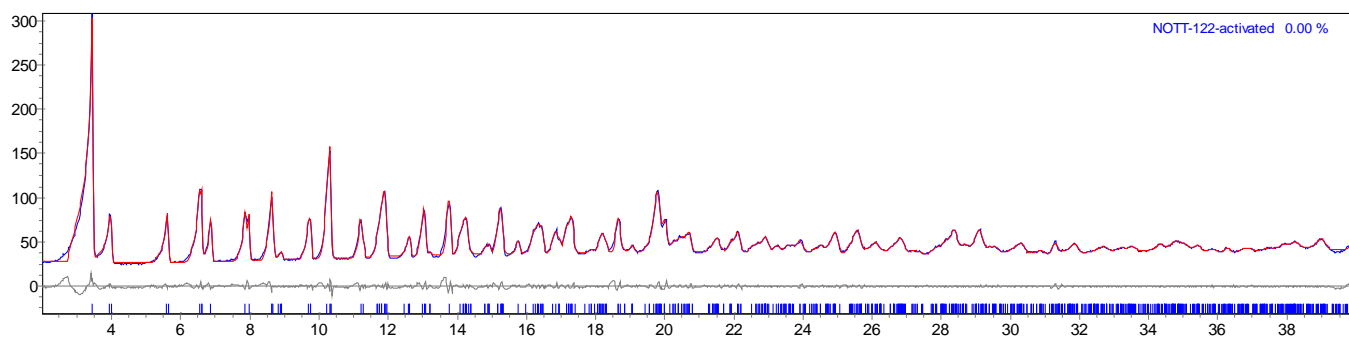

**Figure S11.** Le Bail fitting for the PXRD pattern of the activated NOTT-122a ( $R_{wp} = 7.12\%$ ).

## 6. BET surface area and pore size distribution

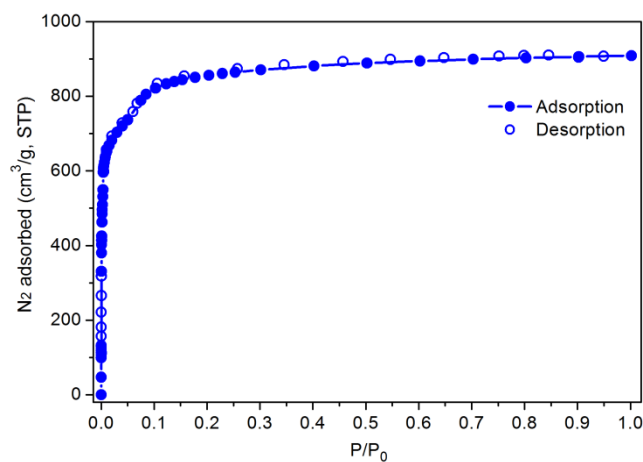

**Figure S12.**  $N_2$  adsorption-desorption isotherms for NOTT-122a at 77 K.

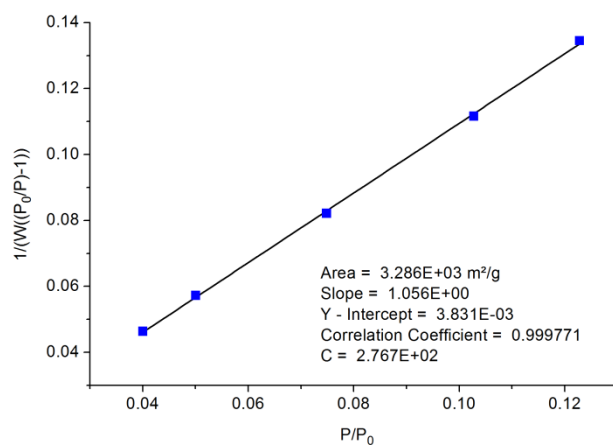

**Figure S13.** The BET plot derived from  $N_2$  uptake in NOTT-122a in the range ( $P/P_0 = 0.04 - 0.13$ ).

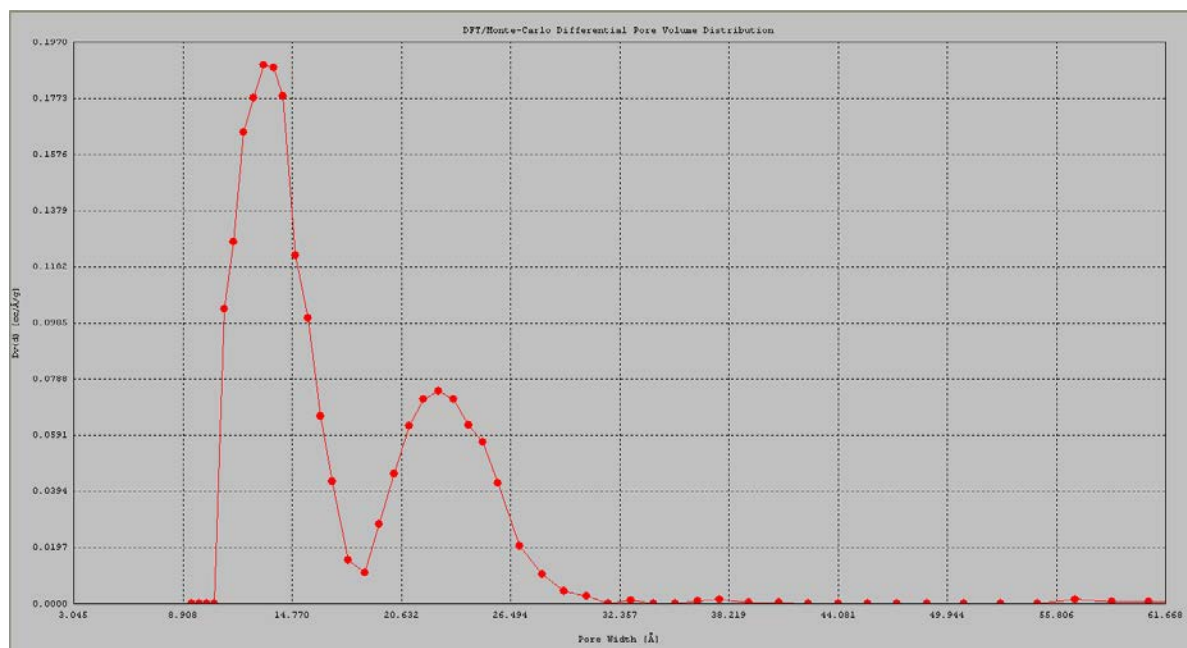

**Figure S14.** Pore size distribution for NOTT-122a calculated by NLDFT.

## 7. H<sub>2</sub> sorption isotherms and heats of H<sub>2</sub> adsorption for NOTT-122a

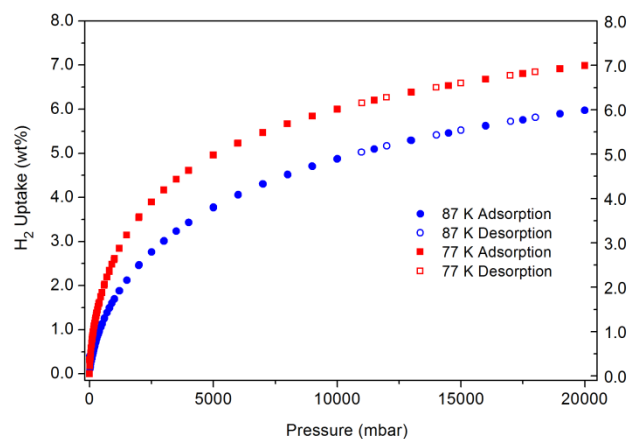

**Figure S15.** H<sub>2</sub> sorption isotherms for NOTT-122a at 77 and 87 K. wt% = 100(weight of adsorbed H<sub>2</sub>/weight of host material).

A virial-type expression<sup>5-7</sup> (eq 1, virial method II) was used to fit the combined isotherm data at 77 and 87 K:

$$\ln(P) = \ln(N) + \left(1/T\right) \sum_{i=0}^m a_i N^i + \sum_{j=0}^n b_j N^j \quad (1)$$

Here,  $P$  is the pressure expressed in mbar,  $N$  is the amount adsorbed in mol/g,  $T$  is the temperature in K,  $a_i$  and  $b_j$  are Virial coefficients (temperature independent empirical parameters), and  $m$  and  $n$  represent the number of coefficients. The equation was fitted using the **R** statistical software package.<sup>8</sup> The values of the virial coefficients  $a_0$  through  $a_m$  were then used to calculate the isosteric heat of adsorption using the following equation:

$$Q_{st} = -R \sum_{i=0}^m a_i N^i \quad (2)$$

Here,  $Q_{st}$  is the coverage-dependent isosteric heat of adsorption and  $R$  is the universal gas constant.

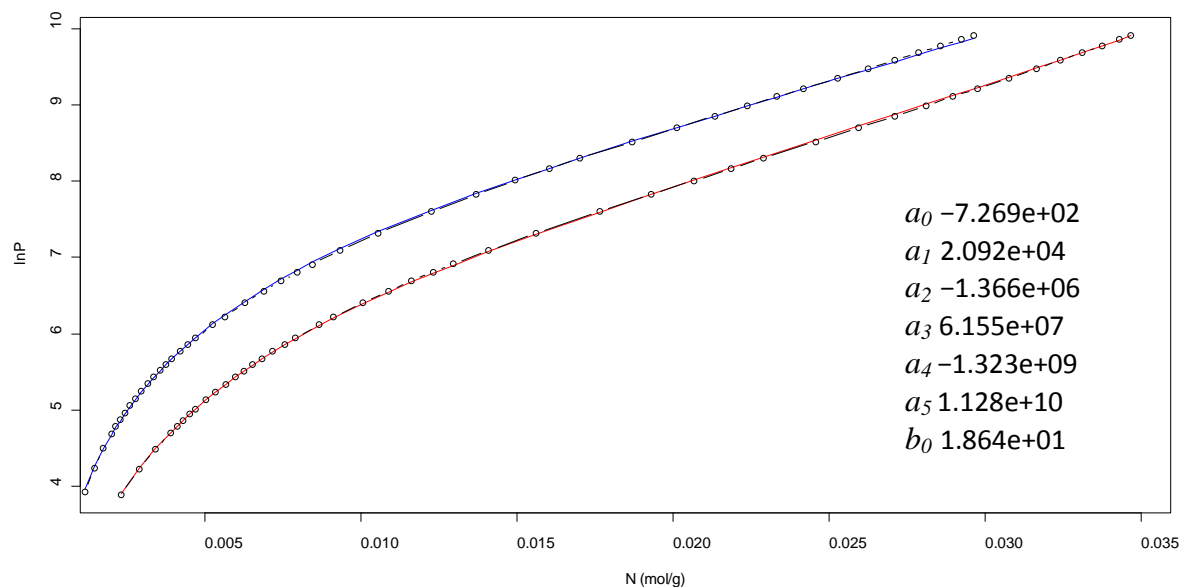

**Figure S16.** Virial analysis of the H<sub>2</sub> adsorption data for NOTT-122a (red line: 77 K; blue line, 87 K).

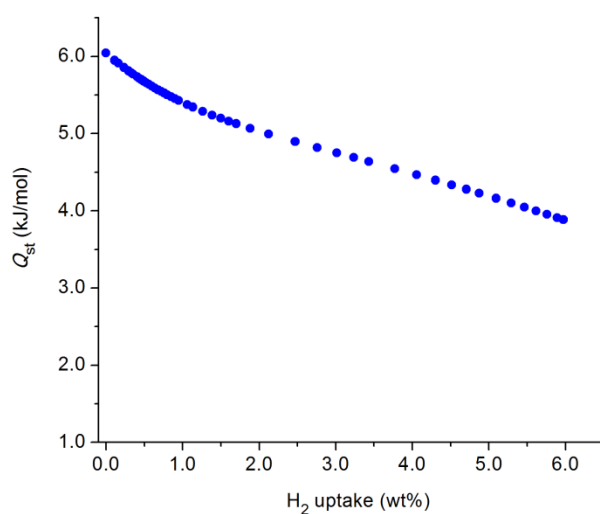

**Figure S17.** Heats of adsorption for H<sub>2</sub> in NOTT-122a.

## 8. Heats of adsorption for CO<sub>2</sub> in NOTT-122

The CO<sub>2</sub> adsorption isotherms at 273 and 298 K were fitted to the virial equation (eq 3, virial method D):<sup>9-11</sup>

$$\ln\left(\frac{n}{p}\right) = A_0 + A_1n + A_2n^2 + A_3n^3 + \dots (3)$$

where  $P$  is the pressure,  $n$  is total amount adsorbed and  $A_0$ ,  $A_1$ ,  $A_2$  etc. are virial coefficients. The Henry's Law constant is given by  $K_H = \exp(A_0)$ . The enthalpy of adsorption at zero coverage was determined from the relationship:

$$\delta A_0 = RQ_{st}^{n=0} \delta(T^{-1}) \quad (4)$$

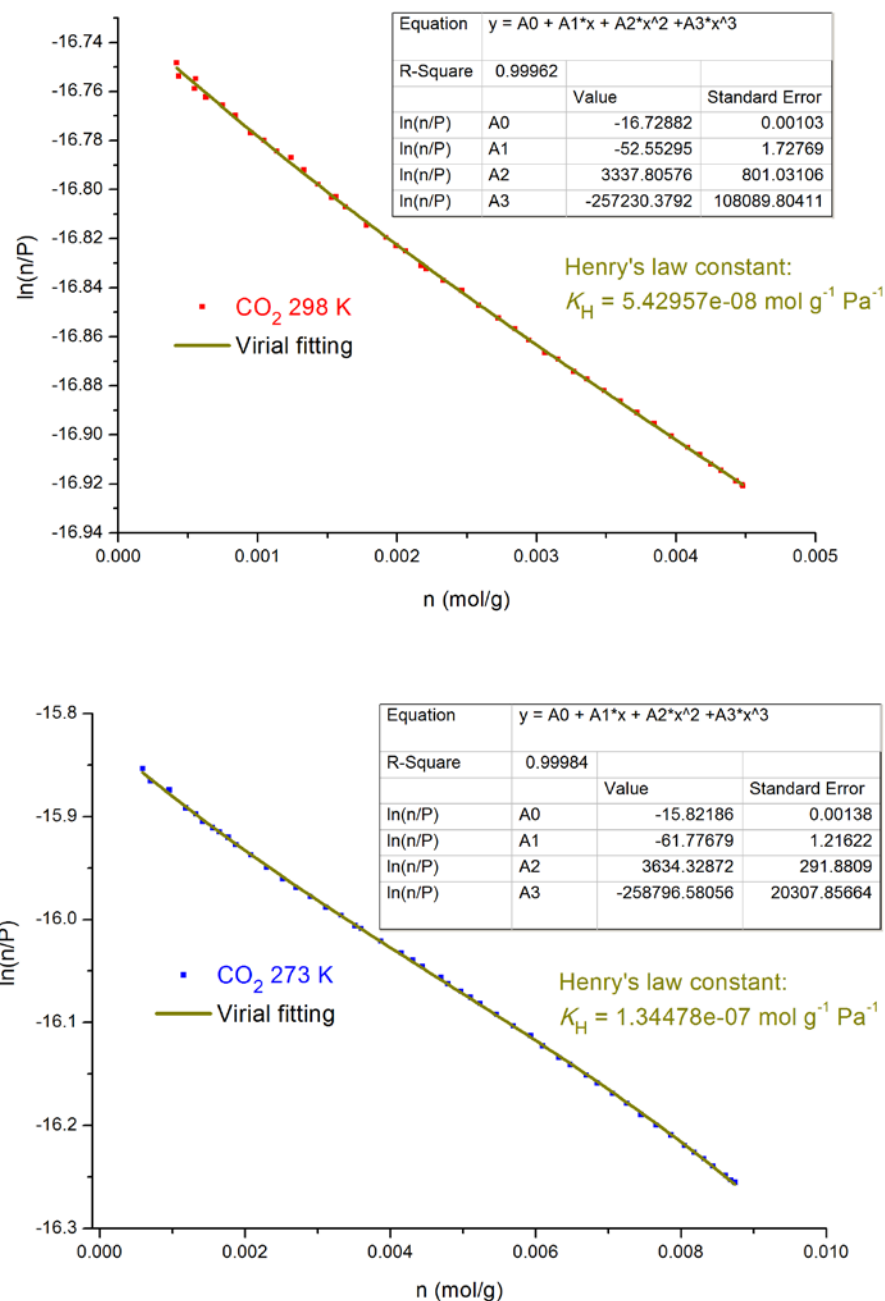

**Figure S18.** Virial analysis of the CO<sub>2</sub> isotherms for NOTT-122a at 298 and 273 K.



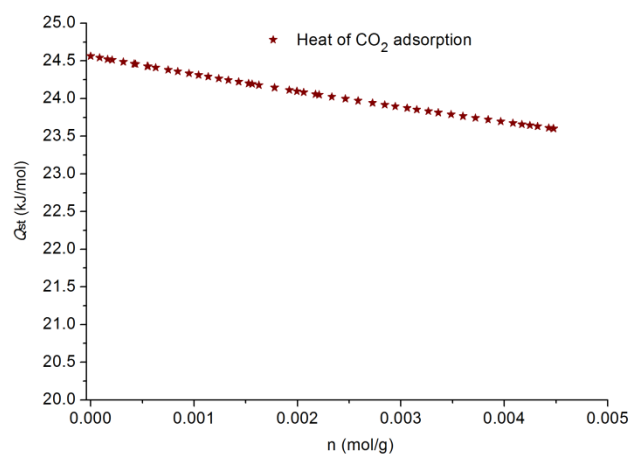

**Figure S19.** Heats of adsorption of CO<sub>2</sub> in NOTT-122a.

### 9. CO<sub>2</sub> sorption isotherm for NOTT-122 at 20 bar and 298 K

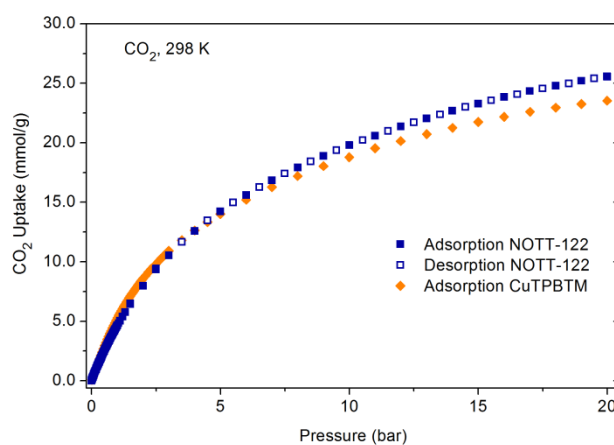

**Figure S20.** Comparison of the CO<sub>2</sub> adsorption isotherms for NOTT-122a and CuTPBTM<sup>12</sup> in the pressure range of 0–20 bar at 298 K.

### 10. CO<sub>2</sub>/N<sub>2</sub> and CO<sub>2</sub>/CH<sub>4</sub> Selectivities in NOTT-122a

The Henry's Law selectivity for gas component *i* over *j* at a specific temperature is calculated based on Eq. 5.

$$S_{ij} = K_{Hi}/K_{Hj} \quad (5)$$

The Henry's Law constants for N<sub>2</sub> and CH<sub>4</sub> adsorption at 298 and 273 K were calculated directly from the adsorption isotherms.

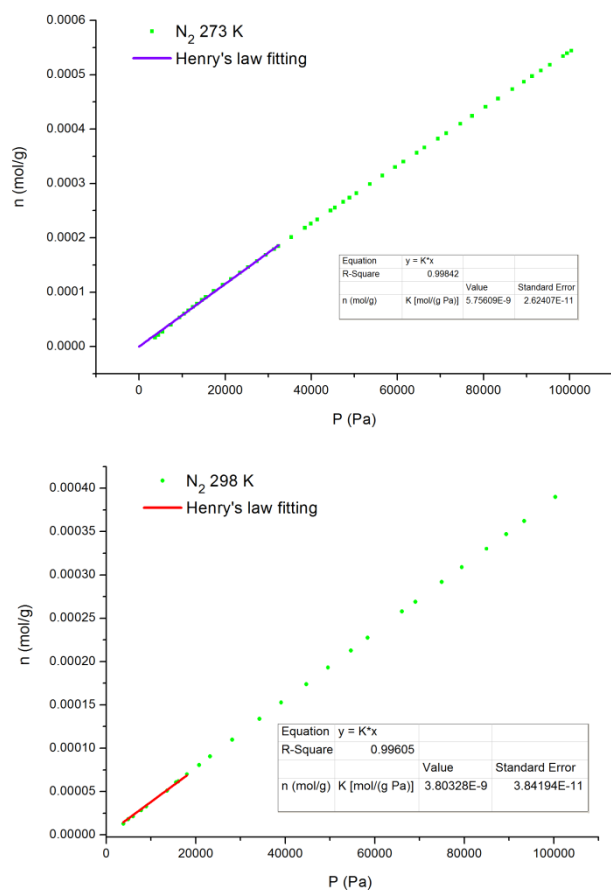

**Figure S21.** Fitting of the initial slope in N<sub>2</sub> isotherms for NOTT-122a collected at 273 and 298 K.

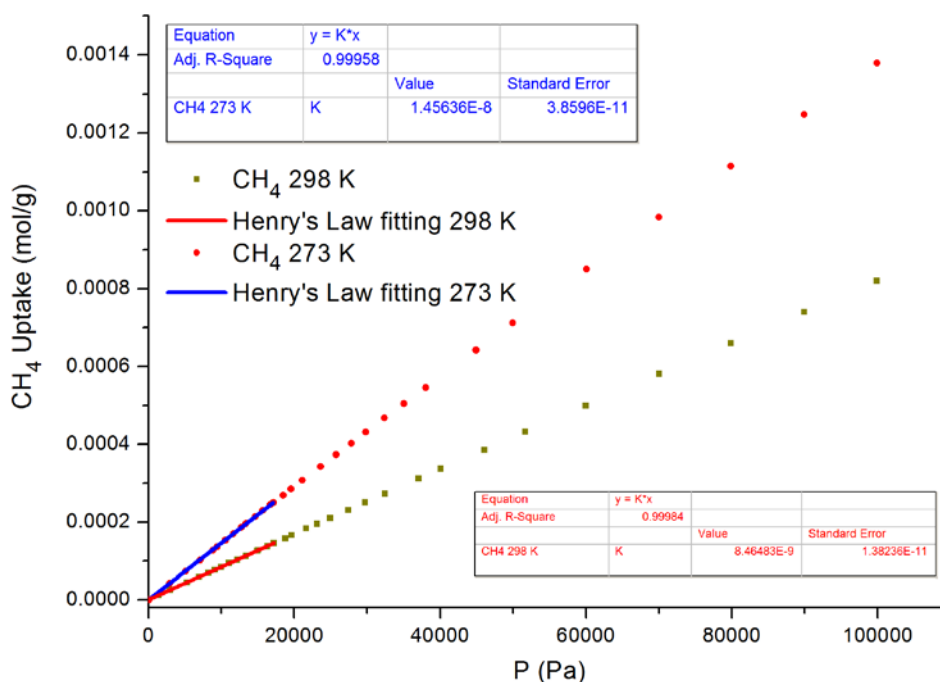

**Figure S22.** Fitting of the initial slope for CH<sub>4</sub> isotherms for NOTT-122 collected at 273 and 298 K.

## 11. GCMC simulations for H<sub>2</sub>, CH<sub>4</sub> and CO<sub>2</sub> adsorption in NOTT-122a.

Grand Canonical Monte Carlo (GCMC) simulations were performed to assess the adsorption of H<sub>2</sub>, CH<sub>4</sub> and CO<sub>2</sub> in NOTT-122a. Periodic boundary conditions were applied to a unit cell. The simulation parameters for CO<sub>2</sub> were taken from the TraPPE force field.<sup>13</sup> The CO<sub>2</sub> molecule was assumed to have the C–O bond length of 1.16 Å, and three charged Lennard-Jones interaction sites with the following parameters:  $\sigma_{\text{O}}=3.05$  Å,  $\varepsilon_{\text{O}}/k_{\text{B}} = 79$  K for oxygen atom, and  $\sigma_{\text{C}} = 2.80$  Å and  $\varepsilon_{\text{C}}/k_{\text{B}} = 27$  K for carbon atom. A point charge of + 0.7 was placed at the centre of mass of carbon atom and a point charge of –0.35 was placed at oxygen atom. The fugacity was calculated from the Peng-Robinson equation of state,<sup>14</sup> and the dispersion interactions of the framework atoms modelled by the Universal Force Field (UFF).<sup>15</sup> A number of simulation studies have shown that UFF can accurately predict gas adsorption in various MOFs.<sup>16–19</sup> The DREIDING force field<sup>20</sup> was employed to describe parameters of the framework in the H<sub>2</sub> and CH<sub>4</sub> sorption simulation. The framework and the gas molecules were considered to be rigid. Lennard-Jones (LJ) potential has been used to describe the Van der Waals interactions with a cut-off distance of 15.0 Å. The partial charges for atoms of the MOF have been computed using CHELPG approach, B3LYP level of density functional theory, and the 6-31G\* basis set as implemented in Q-Chem quantum chemistry package.<sup>21</sup> The GCMC simulations were performed with MUSIC simulation

suite<sup>22</sup> and included  $10^7$  step equilibration period followed by  $10^7$  step production run.

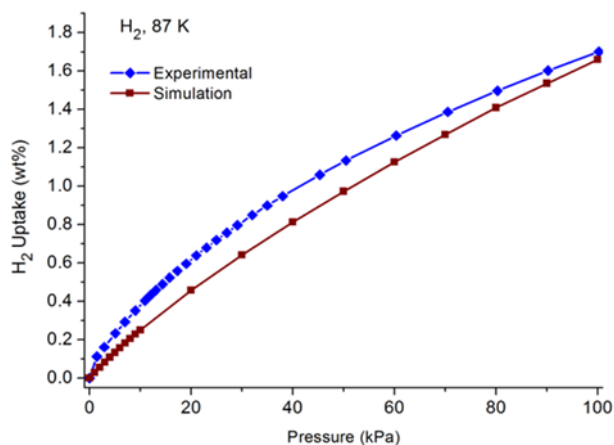

**Figure S23.** Comparison of the experimental and simulated H<sub>2</sub> adsorption isotherms for NOTT-122 at 87 K.

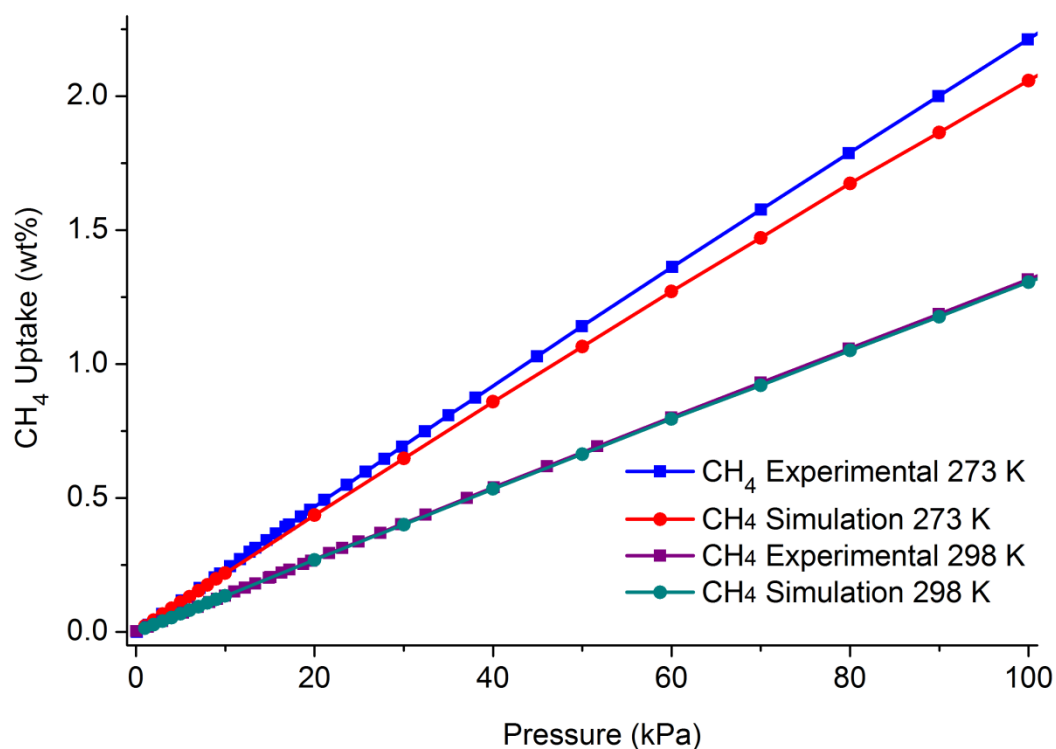

**Figure S24.** Comparisons of the experimental and simulated CH<sub>4</sub> adsorption isotherms for NOTT-122a at 298 and 273 K in the pressure range 0 – 100 kPa. The simulated CH<sub>4</sub> isotherms of NOTT-122a show excellent agreement with the experimental isotherms.

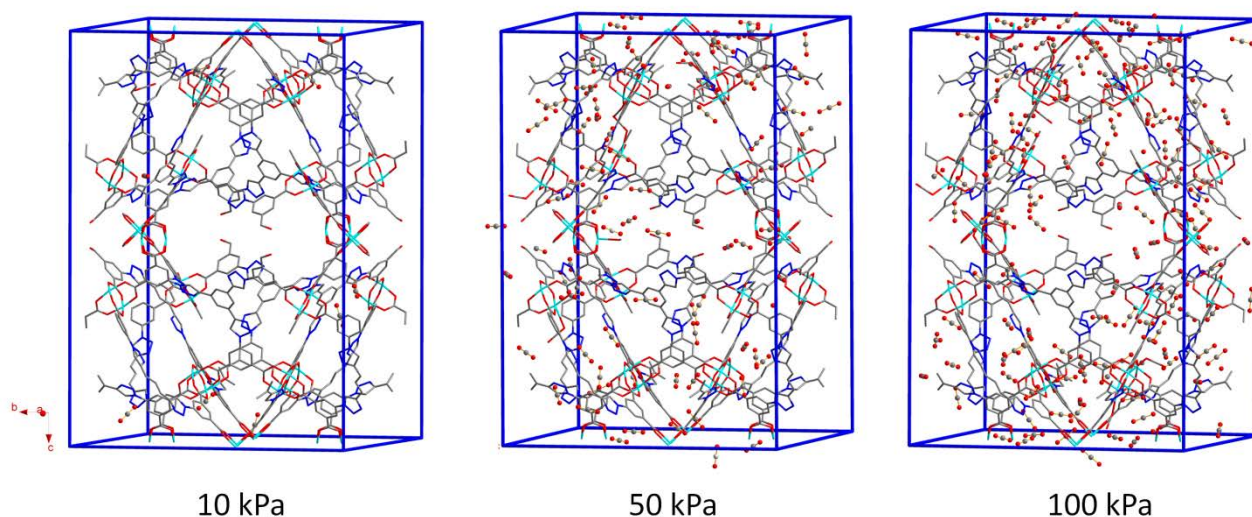

**Figure S25.** Adsorption of CO<sub>2</sub> into the structure of NOTT-122a containing hierarchically-assembled cages derived from GCMC simulations at different pressures and 273 K.

## References:

1. Cadeddu, A.; Ciesielski, A.; Malah, T. E.; Hecht, S.; Samorì, P. *Chem. Commun.* **2011**, 47, 10578–10580.
2. Chan, T. R.; Hilgraf, R.; Sharpless, K. B.; Fokin, V. V. *Org. Lett.* **2004**, 6, 2853–2855.
3. Sheldrick, G. M. *SHELXS97. Acta Crystallogr., Sect. A* **2008**, 64, 112–122.
4. Spek, A. L. *Acta Crystallogr., Sect. D*, **2009**, 65, 148–155.
5. Czepirski, L.; Jagiello, J. *Chem. Eng. Sci.* **1989**, 44, 797–801.
6. Jagiello, J.; Bandoz, T. J.; Schwarz, J. A. *Langmuir* **1996**, 12, 2837–2842.
7. Anson, A.; Jagiello, J.; Parra, J. B.; Sanjuan, M. L.; Benito, A. M.; Maser, W. K.; Martinez, M. T. *J. Phys. Chem. B* **2004**, 108, 15820–15826.
8. Download, instructions, and further details on the use and capabilities of this software package are available online at <http://www.r-project.org>.
9. O’Koye, I. P.; Benham, M.; Thomas, K. M. *Langmuir* **1997**, 13, 4054–4059.
10. Reid, C. R.; O’Koye, I. P.; Thomas, K. M. *Langmuir* **1998**, 14, 2415–2425.
11. Reid, C. R.; Thomas, K. M. *Langmuir* **1999**, 15, 3206–3218.

12. Zheng, B.; Bai, J.; Duan, J.; Wojtas, L.; Zaworotko, M. J. *J. Am. Chem. Soc.* **2011**, *133*, 748–751.
13. Potoff, J. J.; Siepmann, J. I. *AIChE Journal* **2002**, *47*, 1676–1682.
14. Peng, D.-Y.; Robinson, D. B. *Ind. Eng. Chem. Fundamen.* **1976**, *15*, 59–64.
15. Rappe, A. K.; Casewit, C. J.; Colwell, K. S.; Goddard III, W. A.; Skid, W. M. *J. Am. Chem. Soc.* **1992**, *114*, 10024–10035.
16. Panda, T.; Pachfule, P.; Chen, Y.; Jiang, J.; Banerjee, R. *Chem. Commun.* **2011**, *47*, 2011–2013.
17. Garberoglio, G.; Skoulidas, A. I.; Johnson, J. K. *J. Phys. Chem. B.* **2005**, *109*, 13094–13103.
18. Skoulidas, A. I.; Sholl, D. S. *J. Phys. Chem. B.* **2005**, *109*, 15760–15768.
19. Babarao, R.; Jiang, J. W. *Langmuir* **2008**, *24*, 6270–6278.
20. Mayo, S. L.; Olafson, B. D.; Goddard III, W. A. *J. Phys. Chem.* **1990**, *94*, 8897–8909.
21. Shao, Y. et al. *Phys. Chem. Chem. Phys.* **2006**, *8*, 3172.
22. Gupta, A.; Chempath, S.; Sanborn, M. J.; Clark, L. A.; Snurr, R. Q. *Mol. Simul.* **2003**, *29*, 29–46.
